# Supplementary material
Source: publisher figshare collection journal article supplement (https://tandf.figshare.com/ndownloader/files/31338277)
Supplement: Supplementary file 1 [file 31338277]

**Arctic Answers Knowledge Pyramid**

*“How will diminishing sea ice impact commercial fishing in the Bering Sea?”*

*by George L. Hunt, Jr., Lisa Eisner, and Neysa M. Call*

*
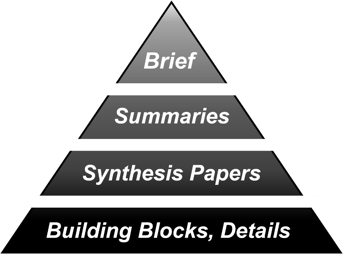
*

**Arctic Answers Briefs** answer questions about Arctic environmental change that are framed for policy makers. Each Brief concisely conveys the state of knowledge and forms the **Knowledge Pyramid** apex. Supporting literature is presented below the brief in tiers of increasingly more technical information: non-technical summaries, synthesis papers, and the building blocks of detailed technical studies.

**Key References:  *Selected references from the Brief that provide state-of-the-art synthesis information needed to answer policy-relevant questions about rapid Arctic change.***

<http://www.akrdc.org/fisheries>

<http://labor.alaska.gov/trends/nov17.pdf>

Hermann, A.J., G.A Gibson, W. Cheng, I. Ortiz, K. Aydin, M. Wang, A.B. Hollowed, and K.K. Holsman. 2019. Projected biophysical conditions of the Bering Sea to 2100 under multiple emission scenarios. *ICES Journal of Marine Science* 76: 1280-1304. <https://doi.org/10.1093/icesjms/fsz043>.

Hunt, Jr., G.L., E.M Yasumiishi, L.B. Eisner, P.J. Stabeno, and M.B. Decker. 2020. Climate warming and the loss of sea ice: the impact of sea-ice variability on the southeastern Bering Sea pelagic ecosystem. *ICES Journal of Marine Science* fsaa206. <https://doi.org/10.1093/icesjms/fsaa206>.

Stevenson, D.E., and R.R. Lauth. 2019. Bottom trawl surveys in the northern Bering Sea indicate recent shifts in the distribution of marine species. *Polar Biology* 42: 407-421. <https://doi.org/10.1007/s00300-018-2431-1>.

Thoman Jr., R.L., U.S. Bhatt, P.A. Bieniek, B.R. Brettschneider, M. Brubaker, S.L. Danielson, Z. Labe, et al. 2020. Record low Bering Sea ice extent in 2018: context, impacts and an assessment of the role of anthropogenic climate change. [in “Explaining Extremes of 2018 from a Climate Perspective”]. *Bulletin of the American Meteorological Society* 101 (1), S17–S22, DOI:10.1175/BAMS--D19-0175.1.

**Summaries:  *State-of-the-art information on main findings, critical questions, and societal importance written for non-technical audiences.***

Alaska Ocean Observing System. 2020. *Bering Science*. <https://uaf-iarc.org/wp-content/uploads/2020/06/Bering-Science_June-4-2020_HMcfarland-WEB-2.pdf>.

Gramling, C. 2020. Bering Sea winter ice shrank to its lowest level in 5,500 years in 2018. *Science News*, <https://www.sciencenews.org/article/climate-change-bering-sea-ice-winter-melt-lowest-level>.

Harvey, C. 2021.Abnormally Warm Years Caused a Sea Change in Coastal Alaska Ecosystems. *Scientific American*, <https://www.scientificamerican.com/article/abnormally-warm-years-caused-a-sea-change-in-coastal-alaska-ecosystems/>.

Link, J.S., G. Huse, S. Gaichas, S. and A.R. Marsha. 2020. Changing how we approach fisheries: a first attempt at an operational framework for ecosystem approaches to fisheries management. *Fish and Fisheries* 21: 393–434. <https://doi.org/10.1111/faf.12438>.

National Marine Fisheries Service. 2020. Fisheries of the United States 2018. U.S. Department of Commerce, NOAA Current Fishery Statistics No. 2018. <https://www.fisheries.noaa.gov/national/commercial-fishing/fisheries-united-states-2018>.

Rosen, Y. 2019.Why the Bering Sea is a hotspot of climate change — and a sentinel for rest of the world.*Arctic Today.*<https://www.arctictoday.com/why-the-bering-sea-is-a-hotspot-of-climate-change-and-sentinel-for-rest-of-the-world/>

**Syntheses: *Resources for a comprehensive and often more technical understanding of the issue and how different concepts interrelate.***

Coyle, K.O., L.B. Eisner, F.J. Mueter, A.I. Pinchuk, M.A. Janout, K.D. Cieciel, E. Farley, et al. 2011. Climate change in the southeastern Bering Sea: impacts on pollock stocks and implications for the oscillating control hypothesis. *Fisheries Oceanography* 20: 139–156. <https://doi.org/10.1111/j.1365-2419.2011.00574.x>

Duffy-Anderson, J.T., S. Barbeaux, E. Farley, R. Heintz, J.K. Horne, S.L. Parker-Setter, C. Petrik, et al. 2016. The critical first year of life of walleye pollock (*Gadus chalcogrammus*) in the eastern Bering Sea: implications for recruitment and future research. *Deep-Sea Research II: Topical Studies in Oceanography* 134: 283–301. <https://doi.org/10.1016/j.dsr2.2015.02.001>.

Duffy-Anderson, J.T., P. Stabeno, A.G. Andrews III, K. Cieciel, A. Deary, E. Farley, C. Fugate, et al. 2019. Responses of the northern Bering Sea and southeastern Bering Sea pelagic ecosystems following record-breaking low winter sea ice. *Geophysical Research Letters* 46: 9833–9842. <https://doi.org/10.1029/2019GL083396>.

Eisner, L.B., J.M. Napp, K.L. Mier, A.I. Pinchuk, and A.G. Andrews. 2014. Climate-mediated changes in zooplankton community structure for the eastern Bering Sea. *Deep-Sea Research II: Topical Studies in Oceanography* 109: 157–171. <https://doi.org/10.1016/j.dsr2.2014.03.004>.

Hunt, Jr., G.L., Coyle, K.O., Eisner, L.B., Farley, E.V., Heintz, R.A., Mueter, F., Napp, J.M., et al. 2011. Climate impacts on eastern Bering Sea food webs: a synthesis of new data and an assessment of the Oscillating Control Hypothesis. *ICES Journal of Marine Science* 68: 1230–1243. <https://doi.org/10.1093/icesjms/fsr036>

Huntington, H.P., S.L. Danielson, F.K. Wiese, M. Baker, M., P. Boveng, J.J. Citta, A. De Robertis, et al. 2020. Evidence suggests potential transformation of the Pacific Arctic ecosystem is underway. *Nature Climate Change* 10 (4): 342–348. <https://doi.org/10.1038/s41558-020-0695-2>.

Kimmel, D.G., L.B. Eisner, M.T. Wilson, and J.T. Duffy-Anderson. 2018. Copepod dynamics across warm and cold periods in the eastern Bering Sea: implications for walleye pollock (*Gadus chalcogrammus*) and the Oscillating Control Hypothesis. *Fisheries Oceanography* 27: 143–158. <https://doi.org/10.1111/fog.12241>.

Mueter, F.J., N.A. Bond, J.N. Ianelli, and A.B. Hollowed. 2011. Expected declines in recruitment of walleye pollock (*Theragra chalcogramma*) in the eastern Bering Sea under future climate change. *ICES Journal of Marine Science* 68: 1284–1296. <https://doi.org/10.1093/icesjms/fsr022>.

Ortiz, I., K. Aydin, A.J. Hermann, G.A. Gibson, A.E. Punt, F.K. Wiese, L.B. Eisner, et al. 2016. Climate to Fish: Synthesizing field work, data and models in a 39-year retrospective analysis of seasonal processes on the eastern Bering Sea shelf and slope. *Deep-Sea Research II: Topical Studies in Oceanography* 134: 390- 412. <https://doi.org/10.1016/j.dsr2.2016.07.009>.

Overland, J.E., M. Wang, K.R. Wood, D.B. Percival, and N.B. Bond. 2012. Recent Bering Sea warm and cold events in a 95-year context. *Deep-Sea Research II: Topical Studies in Oceanography* 65-70: 6–13. <https://doi.org/10.1016/j.dsr2.2012.02.013>.

Petrik, C.M., Duffy-Anderson, J.T. Duffy-Anderson, F. Castruccio, E.N. Curchitser, S.L. Danielson, K. Hedstrom, F. Mueter. 2016. Modelled connectivity between Walleye Pollock (*Gadus chalcogrammus*) spawning and age-0 nursery areas in warm and cold years with implications for juvenile survival. *ICES Journal of Marine Science* 73: 1890–1900. <https://doi.org/10.1093/icesjms/fsw004>.

Siddon, E.C., S.G. Zador, and G.L. Hunt, Jr. 2020. Ecological responses to climate perturbations and minimal sea ice in the northern Bering Sea. *Deep-Sea Research II: Topical Studies in Oceanograph*y 181: 104914. <https://doi.org/10.1016/j.dsr2.2020.104914>.

Sigler, M., J. Napp,P.J. Stabeno, R.A. Heintz, M.L. Lomas, and G.L. Hunt, Jr. 2016. Variation in annual production of copepods, euphausiids, and juvenile walleye pollock in the southeastern Bering Sea. *Deep-Sea Research II: Topical Studies in Oceanography* 134: 223–234. <https://doi.org/10.1016/j.dsr2.2016.01.003>

Stabeno, P.J., and S.W. Bell. 2019. Extreme conditions in the Bering Sea (2017–2018): record-breaking low sea-ice extent. *Geophysical Research Letters* 46: 8952–8959. <https://doi.org/10.1029/2019GL083816>.

Stabeno, P.J., S.L. Danielson, D.G. Kachel, N.B. Katchel, and C.W. Mordy. 2016. Currents and transport on the Eastern Bering Sea shelf: an integration of over 20 years of data. *Deep-Sea Research II: Topical Studies in Oceanography* 134: 13–29. <https://doi.org/10.1016/j.dsr2.2016.05.010>.

Stabeno, P.J., E.V. Farley Jr., N.B. Kachel, S. Moore, C.W. Mordy, J.M. Napp, J.E. Overland, et al., 2012. A comparison of the physics of the northern and southern shelves of the eastern Bering Sea and some implications for the ecosystem. *Deep-Sea Research II: Topical Studies in Oceanography* 65– 70: 14–30. <https://doi.org/10.1016/j.dsr2.2012.02.019>.

Stabeno, P.J., N.B. Kachel, S.E. Moore, J.M. Napp, M. Sigler, A. Yamaguchi, and A.N. Zerbini. 2012. Comparison of warm and cold years on the southeastern Bering Sea shelf and some implications for the ecosystem. *Deep-Sea Research II: Topical Studies in Oceanography* 65-70: 31–45. <https://doi.org/10.1016/j.dsr2.2012.02.020>.

Uchiyama, T., F.J. Mueter, and G.H. Kruse. 2020. Multispecies biomass dynamics models reveal effects of ocean temperature on predation of juvenile pollock in the eastern Bering Sea. *Fisheries Oceanography* 29: 10-22. <https://doi.org/10.1111/fog.12433>.

Whitehouse, G.A., K.Y. Aydin, A.B. Hollowed, K.K. Holsman, W. Cheng, A. Faig, A.C. Haynie, A.J. Hermann, K.A. Kearney, A.E. Punt, and T. E. Essington. 2021. Bottom–up impacts of forecasted climate change on the eastern Bering Sea food web. *Frontiers in Marine Science* 8:624301. <https://doi.org/10.3389/fmars.2021.624301>.

**Building Blocks: *Technical studies with details and foundational information about individual concepts.***

Buckley, T.W., I. Ortiz, S. Kotwicki, and K. Aydin. 2016. Summer diet composition of walleye pollock and predator-prey relationships with copepods and euphausiids in the eastern Bering Sea, 1987-2011. *Deep-Sea Research II: Topical Studies in Oceanography* 134: 302–311. <https://doi.org/10.1016/j.dsr2.2015.10.009>.

Campbell, R.G., C.J. Ashjian, E.B. Sherr, B.F. Sherr, M. Lomas, C. Ross, P. Alatalo, P., et al. 2016. Mesozooplankton grazing during spring sea-ice conditions in the eastern Bering Sea. *Deep-Sea Research II: Topical Studies in Oceanography* 134: 157–172. <https://doi.org/10.1016/j.dsr2.2015.11.003>.

Durban, E.G., and M.C. Casas. 2014. Early reproduction by *Calanus glacialis* in the northern Bering Sea: the role of ice algae as revealed by molecular analysis. *Journal of Plankton Research* 36 (2): 523-41. <https://doi.org/10.1093/plankt/fbt121>.

Eisner, L.B., E.M. Yasumiishi, A.A. Andrews, III., and C.A. O’Leary. 2020. Large copepods as leading indicators of walleye pollock recruitment in the southeastern Bering Sea: Sample-Based and spatio-temporal model (VAST) results. *Fisheries Research* 232: 105720. <https://doi.org/10.1016/j.fishres.2020.105720>

Farley, Jr., E.V., R.A. Heintz, A.G. Andrews, and T.P. Hurst. 2016. Size, diet, and condition of age-0 Pacific cod (*Gadus macrocephalus*) during warm and cold climate states in the eastern Bering Sea. *Deep-Sea Research II: Topical Studies in Oceanography* 134: 247–254. <https://doi.org/10.1016/j.dsr2.2014.12.011>.

Hintz, R.A., E.C. Siddon, E.V. Farley, Jr., J.M. Napp. 2013. Correlation between recruitment and fall condition of age-0 pollock (*Theragra chalcogramma*) from the eastern Bering Sea under varying climate conditions. *Deep-Sea Research II: Topical Studies in Oceanography* 94: 150–156. <https://doi.org/10.1016/j.dsr2.2013.04.006>.

Hunt, Jr., G. L., E.M. Yasumiishi, L.B. Eisner, P.J. Stabeno, and M.B. Decker. 2020 Climate warming and the loss of sea ice: the impact of sea-ice variability on the southeastern Bering Sea ecosystem. *ICES Journal of Marine Science,* DOI. 10.1093/icesjms/fsaa206. <https://doi.org/10.1093/icesjms/fsaa206>.

Kotwicki, S., T. Buckley, T. Honkaletho, and G. Walters. 2005. Variation in the distribution of walleye pollock with temperature and implications for seasonal migration. *Fisheries Bulletin* 103: 574–587. <http://hdl.handle.net/1834/25628>.

Moss, J.H., E.V. Farley, Jr., A.M. Feldmann, and J.N. Ianelli. 2009. Spatial distribution, energetic status, and food habits of eastern Bering Sea age-0 walleye pollock. *Transactions of the American Fisheries Society*. 138: 497–505. <https://doi.org/10.1577/T08-126.1>.

Mueter, F.J., and M.A. Litzow. 2008. Sea ice retreat alters the biogeography of the Bering Sea continental shelf. *Ecological Applications* 18: 309–320. <https://doi.org/10.1890/07-0564.1>.

Natsuike, M., S. Nagai, K. Matsuno, R. Saito, C. Tsukazaki, A. Yamaguchi, and I. Imai. 2013. Abundance and distribution of toxic *Alexandrium tamarense* resting cysts in the sediments of the Chukchi Sea and the eastern Bering Sea. *Harmful Algae* 27: 52–59. <https://doi.org/10.1016/j.hal.2013.04.006>.

Pease, C.H. 1980. Eastern Bering Sea ice processes. *Monthly Weather Review* 108: 2015–2023. [https://doi.org/10.1175/1520-0493(1980)108<2015:EBSIP>2.0.CO;2](https://doi.org/10.1175/1520-0493(1980)108%3c2015:EBSIP%3e2.0.CO;2).

Siddon, E. (Ed.), 2020. Ecosystem Status Report 2020: Eastern Bering Sea, Stock Assessment and Fishery Evaluation Report. North Pacific Fishery Management Council, 1007 West Third, Suite 400, Anchorage, AK 99501. https://www.fisheries.noaa.gov/resource/data/ecosystem-status-report-2020-eastern-bering-sea.

Siddon, E., S. Zador. 2019. Ecosystem Status Report 2019: Eastern Bering Sea, Stock Assessment and Fishery Evaluation Report. North Pacific Fishery Management Council, 605 W. 4th Ave., Suite 306, Anchorage, AK 99501. https://www.fisheries.noaa.gov/resource/data/ecosystem-status-report-2019-eastern-bering-sea.

Smart, T.I., J.T. Duffy-Anderson, and J.K. Horne. 2012. Alternating temperature states influence walleye pollock early life stages in the southeastern Bering Sea. *Marine Ecology Progress Series* 455: 257–267. <https://doi.org/10.3354/meps09619>.

Sogard, S.M., and B.L. Olla. 2000. Endurance of simulated winter conditions by age-0 walleye pollock: effects of body size, water temperature and energy stores. *Journal of Fish Biology* 56: 1–21. <https://doi.org/10.1111/j.1095-8649.2000.tb02083.x>.

Stevenson, D.E., and R.R. Lauth. 2019. Bottom trawl surveys in the northern Bering Sea indicate recent shifts in the distribution of marine species. *Polar Biology* 42: 407-421. <https://doi.org/10.1007/s00300-018-2431-1>.

Strasburger, W.W., N. Hillgruber, A.I. Pinchuk, and F. Mueter. 2014. Feeding ecology of age-0 walleye pollock (*Gadus chalcogrammus*) and Pacific cod (*Gadus macrocephalus*) in the southeastern Bering Sea. *Deep-Sea Research II: Topical Studies in Oceanography* 109: 172–180. <https://doi.org/10.1016/j.dsr2.2013.10.007>.

Uchiyama, T., F.J. Mueter, and G.H. Kruse. 2020. Multispecies biomass dynamics models reveal effects of ocean temperature on predation of juvenile pollock in the eastern Bering Sea. *Fisheries Oceanography* 29: 10–222. <https://doi.org/10.1111/fog.12433>.

Wang, S.W., S.M. Budge, K. Iken, R.R Gradinger, A.M. Springer, and M.J. Wooller. 2015. Importance of sympagic production to Bering Sea zooplankton as revealed from fatty acid-carbon stable isotope analyses. *Marine Ecology Progress Series* 518: 31-50. <https://doi.org/10.3354/meps11076>.

Wyllie-Echeverria, T., and W.S. Wooster. 1998. Year-to-year variations in Bering Sea ice cover and some consequences for fish distributions. *Fisheries Oceanography* 7: 159–170. <https://doi.org/10.1046/j.1365-2419.1998.00058.x>.

Yasumiishi, E. 2019. Pre- and post-winter temperature change index and the recruitment of Bering Sea pollock. In Ecosystem Status Report 2019: Eastern Bering Sea, pp. 118–119. Ed. by E. Siddon and S. Zador. North Pacific Fishery Management Council, Anchorage, AK.

**For further information, contact the authors:**

*George L. Hunt, Jr., University of Washington*

[*Geohunt2@uw.edu*](mailto:Geohunt2@uw.edu)

*Lisa Eisner, NOAA Alaska Fishery Science Center*

[*Lisa.Eisner@NOAA.gov*](mailto:Lisa.Eisner@NOAA.gov)

*Neysa M. Call, National Science Foundation*

[*ncall@nsf.gov*](mailto:ncall@nsf.gov)
